# Supplementary material for: Transparent boundary condition for the calculation of eigenmodes in transversely infinite waveguides
Source: Copernicus journal article supplement (doi:10.5194/ars-18-7-2020), 2020-12-10
Supplement: Supplementary file 3 [file ars-18-7-2020-supplement.zip]

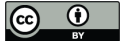

## *Supplement of*

# **Transparent boundary condition for the calculation of eigenmodes in transversely infinite waveguides**

**Mikhail Patrushev et al.**

*Correspondence to:* Mikhail Patrushev ([patrushev@temf.tu-darmstadt.de](mailto:patrushev@temf.tu-darmstadt.de))

- `ars-18-7-2020-supplement-title-page.pdf`
- `JWMB5VBr4b-mesh.png`
- `MS.png`
- `POWERPNT_2019-09-16_11-56-23.png`
- `README_copernicus_package_5_8.txt`
- `compcost-l.tex`
- `compcost-p.tex`
- `copernicus.bst`
- `copernicus.cfg`
- `copernicus.cls`
- `diagram-20190917.pdf`
- `diagram-20190926.pdf`
- `diagram-20190928.pdf`
- `diagram-20190928.png`
- `hankel_log_approx_vergleich.tex`
- `index.tex`
- `ki-example-ms.tex`
- `kir-example-ms.pdf`
- `kir_param_L_1_to_74_l2Err.tex`
- `kir_param_P_1_to_10_l2Err.tex`

- kir\_parameter-l.tex
- kir\_parameter-p.tex
- kir\_spy\_kirandfit.png
- konv\_fpi.tex
- konv\_p.tex
- kz-mitte-propagation-line.tex
- library\_mine.bib
- lwl\_central\_l2error\_p1.jpg
- lwl\_central\_l2error\_p10.jpg
- lwl\_central\_l2error\_p4.jpg
- lwl\_parameterP\_l2er\_with\_l2images.tex
- mesh-for-singularity.tex
- mesh.pdf
- mesh.png
- mesh.tex
- ms-image.tex
- ms.tex
- natbib.sty
- pdfscreen.sty
- pdfscreencop.sty
- pml.tex
- si\_template\_2019.tex
- symm1.tex
- symm2.tex
- trackchanges.sty
- zdl\_tex.tex

The copyright of individual parts of the supplement might differ from the CC BY 4.0 License.
