# Supplementary figures and images for: Transparent boundary condition for the calculation of eigenmodes in transversely infinite waveguides
Source: Copernicus journal article supplement (doi:10.5194/ars-18-7-2020), 2020-12-10

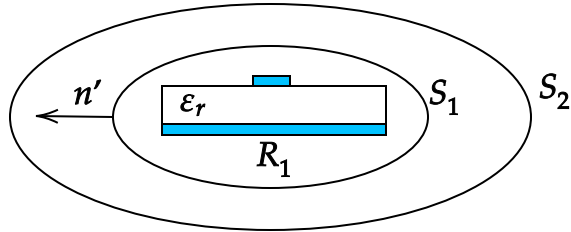

Supplement: Supplementary file 1 [file ars-18-7-2020-supplement.zip]

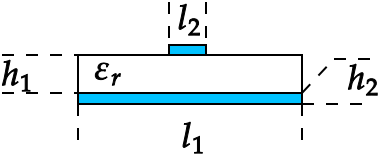

Supplement: Supplementary file 2 [file ars-18-7-2020-supplement.zip]

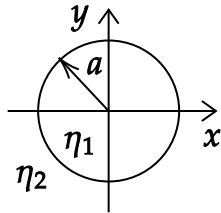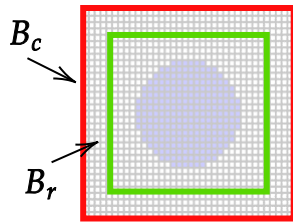

Supplement: Supplementary file 4 [file ars-18-7-2020-supplement.zip]

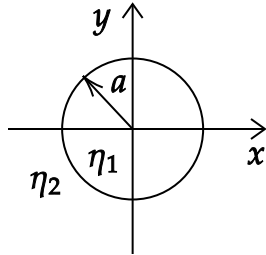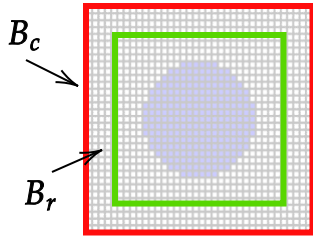

Supplement: Supplementary file 5 [file ars-18-7-2020-supplement.zip]

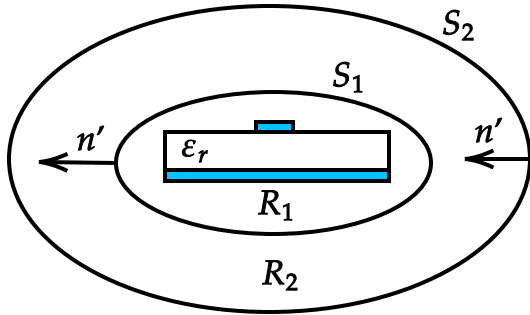

Supplement: Supplementary file 6 [file ars-18-7-2020-supplement.zip]
